# Supplementary material
Source: Springer Nature journal article supplement (https://www.springermedizin.de/resource/supplementary/12911_2007_171_MOESM2_ESM.pdf/9527290)

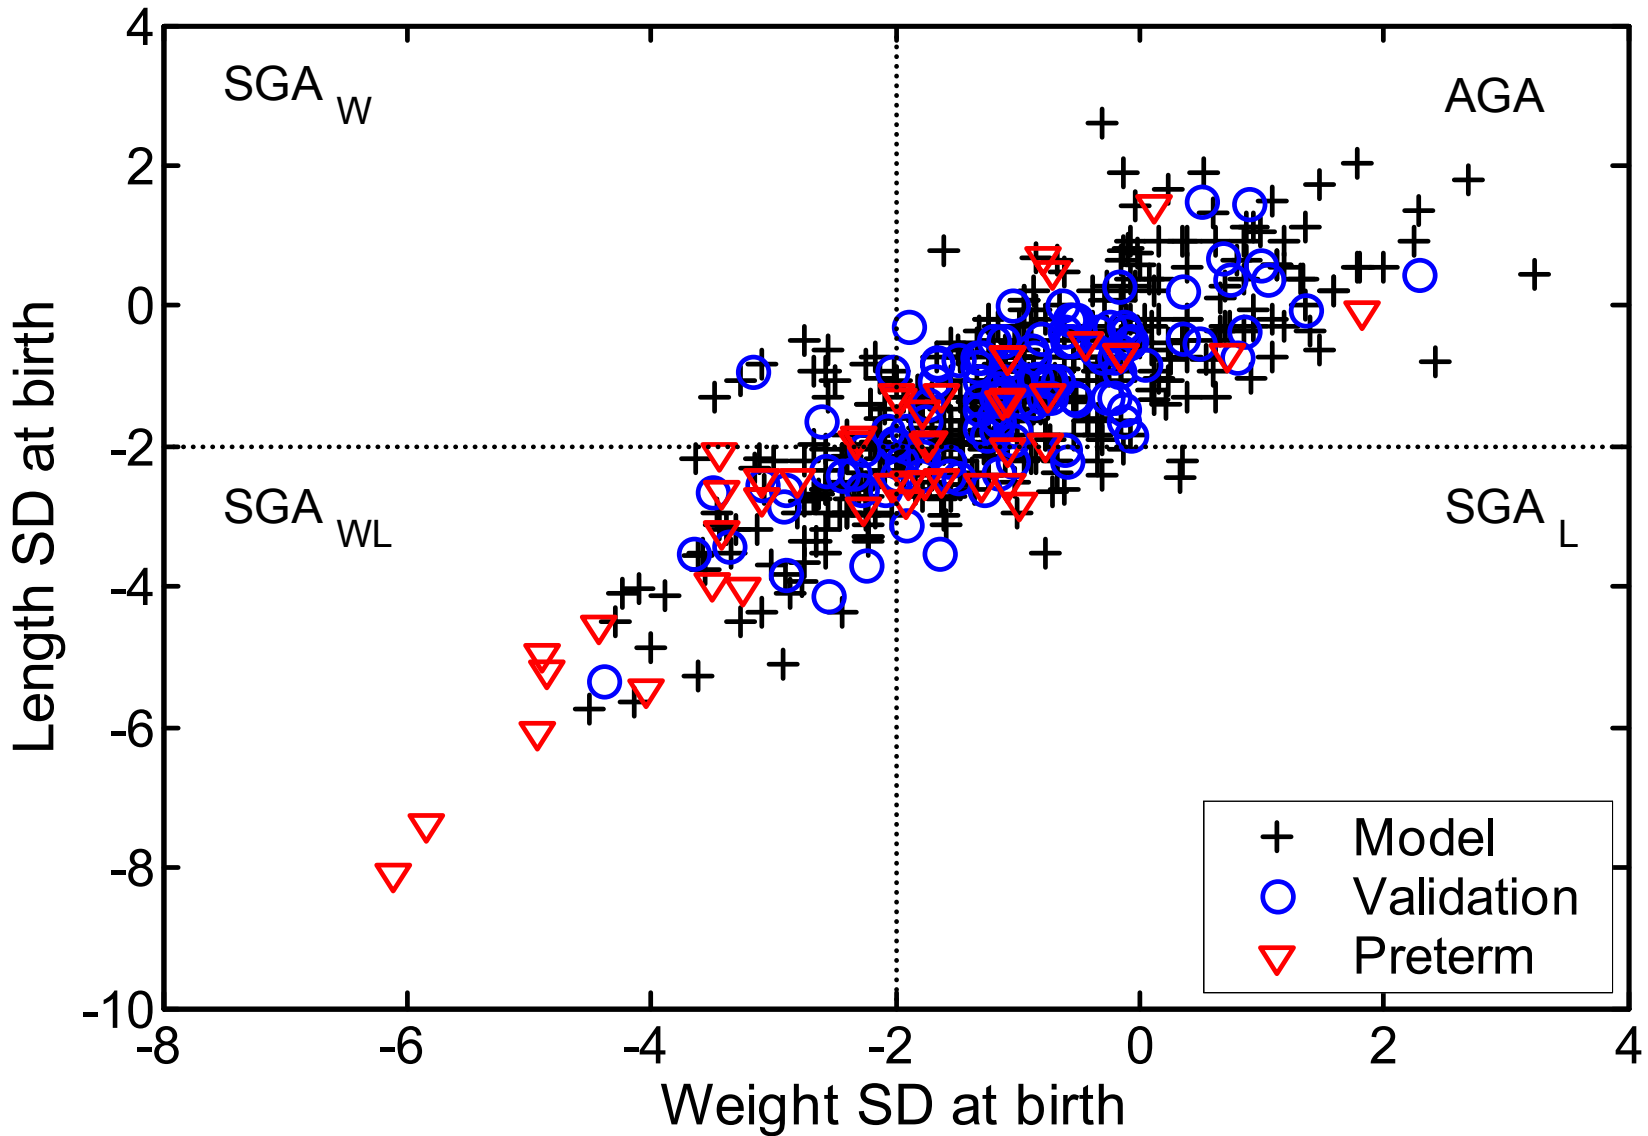

Supplement: MOESM2 [file 9527290]
